# Global drivers of eukaryotic plankton biogeography in the sunlit ocean

**Authors:** Sommeria-Klein, Guilhem<sup>1\*</sup>; Watteaux, Romain<sup>2</sup>; Iudicone, Daniele<sup>2</sup>; Bowler, Chris<sup>1</sup>; Morlon, H el ene<sup>1</sup>

<sup>1</sup>Ecole Normale Sup erieure, PSL Research University, Institut de Biologie de l'Ecole Normale Sup erieure (IBENS), CNRS (UMR 8197, INSERM U1024), 46 rue d'Ulm, F-75005 Paris, France

<sup>2</sup>Stazione Zoologica Anton Dohrn, Villa Comunale, 80121 Naples, Italy

\*Corresponding author: [guilhem.sk@gmail.com](mailto:guilhem.sk@gmail.com)

**Short abstract:** Eukaryotic plankton are a core component of marine ecosystems with exceptional taxonomic and ecological diversity. Yet how their ecology interacts with the environment to drive global distribution patterns is poorly understood. Here, we use *Tara* Oceans metabarcoding data covering all the major ocean basins combined with a probabilistic model of taxon co-occurrence to compare the biogeography of 70 major groups of eukaryotic plankton. We uncover two main axes of biogeographic variation. First, more diverse groups display stronger biogeographic structure. Second, large-bodied consumers are structured by oceanic basins, mostly via the main currents, while small-bodied phototrophs are structured by latitude, with a comparatively stronger influence of biotic conditions. Our study highlights striking differences in biogeographies across plankton groups and disentangles their determinants at the global scale.

**One-sentence summary:** Eukaryotic plankton biogeography and its determinants at global scale reflect differences in ecology and body size.

**Main text:** Marine plankton communities play key ecological roles at the base of oceanic food chains, and in driving global biogeochemical fluxes (Field, Behrenfeld, Randerson, & Falkowski, 1998; Worden et al., 2015). Understanding their spatial patterns of distribution is a long-standing challenge in marine ecology that has lately become a key part of the effort to model the response of oceans to environmental changes (Beaugrand & Kirby, 2018; Raes et al., 2018; Righetti, Vogt, Gruber, Psomas, & Zimmermann, 2019; Tittensor et al., 2010). Part of the difficulty lies in the constant mixing of water masses and hence plankton communities by ocean currents (J onsson & Watson, 2016). Recent planetary-scale ocean sampling expeditions have revealed that eukaryotic plankton are taxonomically and ecologically extremely diverse, possibly even more so than prokaryotic plankton (de Vargas et al., 2015). Eukaryotic plankton range from pico-sized (0.2-2  $\mu$ m) to meso-sized (0.2-20  $\mu$ m) organisms and larger, thus covering an exceptional range of sizes. Eukaryotic plankton also cover a wide range of ecological roles, from phototrophs (e.g., Bacillariophyta, Haptophyta, Mamiellophyceae) to parasites (e.g., Marine Alveolates or MALVs), and from heterotrophic protists (e.g., Diplonemida, Ciliophora, Acantharea) to metazoans (e.g., Arthropoda and Chordata, respectively represented principally by Copepods and Tunicates). Understanding how these body size and ecological differences modulate the influence of oceanic currents and local environmental conditions on geographic distributions is needed if we want to predict how eukaryotic communities, and therefore the trophic interactions and global biogeochemical cycles they participate in, will change with changing environmental conditions.

Previous studies suggested that all eukaryotes up to a size of approximately 1 mm are globally dispersed and primarily constrained by abiotic conditions (Finlay, 2002). While this view has been revised, the influence of body size on biogeography is manifest (Villarino et al., 2018, Richter et al. 2019). Interestingly, a recent study found that the turnover in community composition along currents slows down, rather than speeds up, with increasing

54 body size (Richter et al, 2019). This suggests that, rather than influencing biogeography  
 55 through its effect on abundance and ultimately dispersal capacity (i.e., larger organisms are  
 56 more dispersal-limited; Finlay, 2002; Villarino et al., 2018), body size influences  
 57 biogeography through its relationship with ecology and ultimately the sensitivity of  
 58 communities to environmental conditions as they drift along currents. Under this scenario, the  
 59 distribution of large long-lived generalist predators such as Copepods (Arthropoda) is  
 60 expected to be stretched to the scale of currents systems through large-scale transport and  
 61 mixing by main currents (Hellweger, van Sebille, & Fredrick, 2014; Lévy, Jahn, Dutkiewicz,  
 62 & Follows, 2014; Madoui et al., 2017; Richter et al., 2019), and to be patchy as a result of  
 63 small-scale turbulent stirring (Abraham, 1998). These contrasted views illustrate that little is  
 64 known on how the interplay between body size, ecology, currents and the local environment  
 65 shapes biogeography (Oziel et al., 2020).

66 Here we study plankton biogeography across all major eukaryotic groups in the sunlit  
 67 ocean using 18S rDNA metabarcoding data from the *Tara* Oceans global survey, including  
 68 recently released data from the Arctic Ocean (Ibarbalz et al., 2019). The data encompass  
 69 250,057 eukaryotic Operational Taxonomic Units (OTUs) sampled globally at the surface and  
 70 at the Deep Chlorophyll Maximum (DCM) across 129 stations. We use a probabilistic model  
 71 that allows identification of a number of ‘assemblages’, each of which represents a set of  
 72 OTUs that tend to co-occur across samples (Sommeria-Klein et al., 2019; Valle, Baiser,  
 73 Woodall, & Chazdon, 2014; Methods). Each local planktonic community can then be seen as  
 74 a sample drawn in various proportions from the assemblages.  
 75

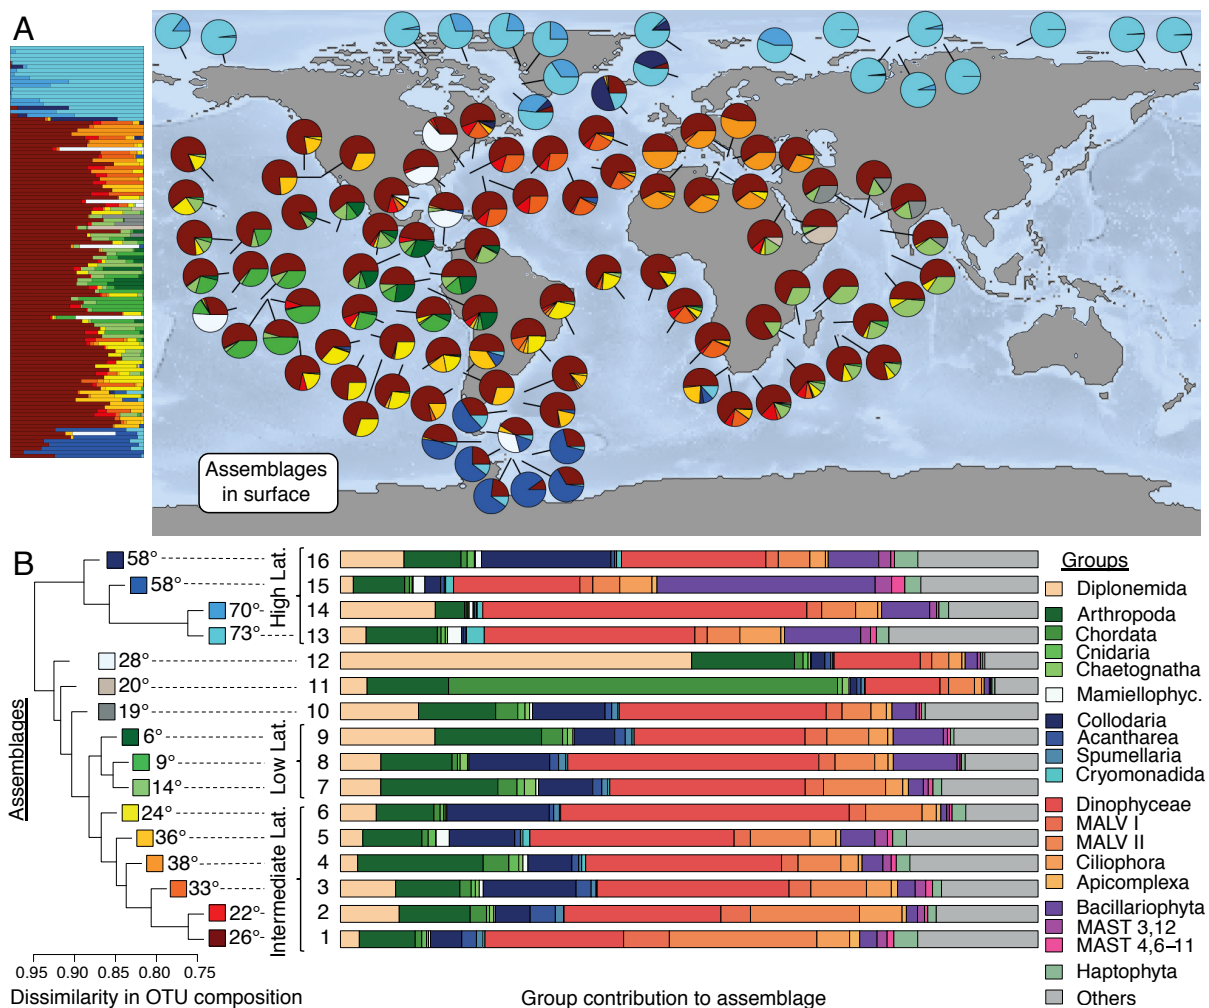

76  
 77  
 78 **Figure 1: Global surface biogeography of eukaryotic plankton.** The biogeography of all eukaryotic OTUs  
 79 across *Tara* Oceans stations is characterized by 16 assemblages of co-occurring OTUs, each represented by a

80 distinct color (in A and the left panel in B) and identified by a number from 1 to 16 (in B). (A) Relative  
81 contribution of the 16 assemblages to surface plankton community in *Tara* Oceans stations, represented as pies  
82 on the world map and as stacked bars vertically ordered by latitude on the left-hand side of the map. (B) Left  
83 panel: dendrogram of assemblage dissimilarity with respect to their composition in OTUs (Simpson  
84 dissimilarity). The mean absolute latitude at which each assemblage is found is indicated. Three clusters can be  
85 distinguished: a high-latitude cluster — the most distinctive — in shades of blue, an intermediate-latitude cluster  
86 in shades from yellow to red, and a low-latitude cluster in shades of green. Right panel: barplot displaying the  
87 contribution of major eukaryotic groups (deep-branching monophyletic groups) to assemblages. The 19 groups  
88 shown in the barplot are those tallying more than 1,000 OTUs, grouped by phylogenetic relatedness.

89  
90 Across the *Tara* Oceans samples and considering all eukaryotic OTUs together, we  
91 identified 16 geographically structured assemblages, each composed of OTUs covering the  
92 full taxonomic range of eukaryotic plankton (Fig. 1, S1; Appendix 1). Local planktonic  
93 communities often cannot be assigned to a single assemblage, as would be typical for  
94 terrestrial macro-organisms on a fixed landscape (Ficetola, Mazel, & Thuiller, 2017; Wallace,  
95 1876), but are instead mixtures of assemblages (Fig. 1A). This is consistent with previous  
96 findings suggesting that neighbouring plankton communities are continuously mixed and  
97 dispersed by currents (Lévy et al., 2014; Richter et al., 2019). Nevertheless, three assemblages  
98 are particularly represented and most communities are dominated by one of them (Fig. 1A).  
99 The most prevalent assemblage represents a set of OTUs (about one fifth of the total) that are  
100 globally ubiquitous except in the Arctic Ocean (assemblage 1, in dark red). This assemblage  
101 typically accounts for about half the number of OTUs in non-Arctic communities, and is  
102 particularly rich in parasitic groups such as MALV (Fig. 1B). The two others dominate,  
103 respectively, in the Arctic Ocean (assemblage 13, in cyan) and in the Southern Ocean  
104 (assemblage 15, in marine blue), and are particularly rich in diatoms (Fig. 1B). Based on  
105 similarity in their OTU composition, the assemblages cluster into three main categories  
106 corresponding to low, intermediate and high latitudes (Fig. 1B). The transition between  
107 communities composed of high-latitude and lower-latitude assemblages is fairly abrupt, and  
108 occurs around 45° in the North Atlantic and -47° in the South Atlantic, namely at the latitude  
109 of the subtropical front, where the transition between cold and warm waters takes place (Fig.  
110 1A&B; Talley, 2011).

111 This global analysis hides a strong heterogeneity across the 70 most diversified deep-  
112 branching groups of eukaryotic plankton (Table S1). Comparing the biogeography of these  
113 major groups using a normalized information-theoretic metric of dissimilarity (Meila, 2006;  
114 Methods), we found high pairwise dissimilarity values (ranging between 0.64 and 0.97; Fig.  
115 S2). This heterogeneity can be decomposed into two main interpretable axes of variation (Fig.  
116 2; Methods). The first axis reflects the *amount* of biogeographic structure: group position on  
117 this axis is positively correlated to short-distance spatial autocorrelation (Pearson's correlation  
118 coefficient  $\rho = 0.91$  at the surface; Fig. S3A), which measures the tendency for close-by  
119 communities to be composed of the same assemblages (Methods). Groups scoring low on this  
120 axis are characterized by strong local variation, or “patchiness”. The second axis reflects the  
121 *nature* of the biogeographic structure: group position on this axis is positively correlated to  
122 the scale of biogeographic organization, which we measured as the characteristic distance at  
123 which spatial autocorrelation vanishes ( $\rho = 0.53$ ,  $p = 10^{-6}$  at the surface; Fig. S3B) and  
124 which ranges from ~7,000 to ~14,400 km across groups. Group position on the second axis is  
125 also positively correlated to within-basin autocorrelation ( $\rho = 0.56$ ,  $p = 10^{-7}$  at the surface;  
126 Fig. S3C), which measures the tendency for communities from the same oceanic basin (e.g.,  
127 North Atlantic, South Atlantic, Mediterranean, Southern Ocean) to be composed of the same  
128 assemblages, and negatively correlated with latitudinal autocorrelation ( $\rho = -0.49$ ,  $p = 10^{-5}$   
129 at the surface; S3D), which measures the tendency for communities at the same latitude on  
130 both sides of the Equator to be composed of the same assemblages (Methods). Results are  
131 similar at the DCM, although less pronounced (Fig. S4). The 70 groups of eukaryotic  
132 plankton cover the full spectra of biogeographies (Fig. 2, Fig. S5, Table S1), from those with  
133 weak spatial organization, or high patchiness (i.e., scoring low on the first axis, such as

134 Collodaria or Basidiomycota), to those organized at large spatial scale by oceanic basin (i.e.,  
135 scoring high on both axes, such as Chordata or Arthropoda), and those organized at smaller  
136 spatial scale and according to latitude (i.e., scoring high on the first and low on the second  
137 axis, such as Mamiellophyceae, Haptophyta or MAST 3,12). These striking differences across  
138 planktonic groups suggest that accounting for their specificities is crucial to understanding  
139 their biogeography.

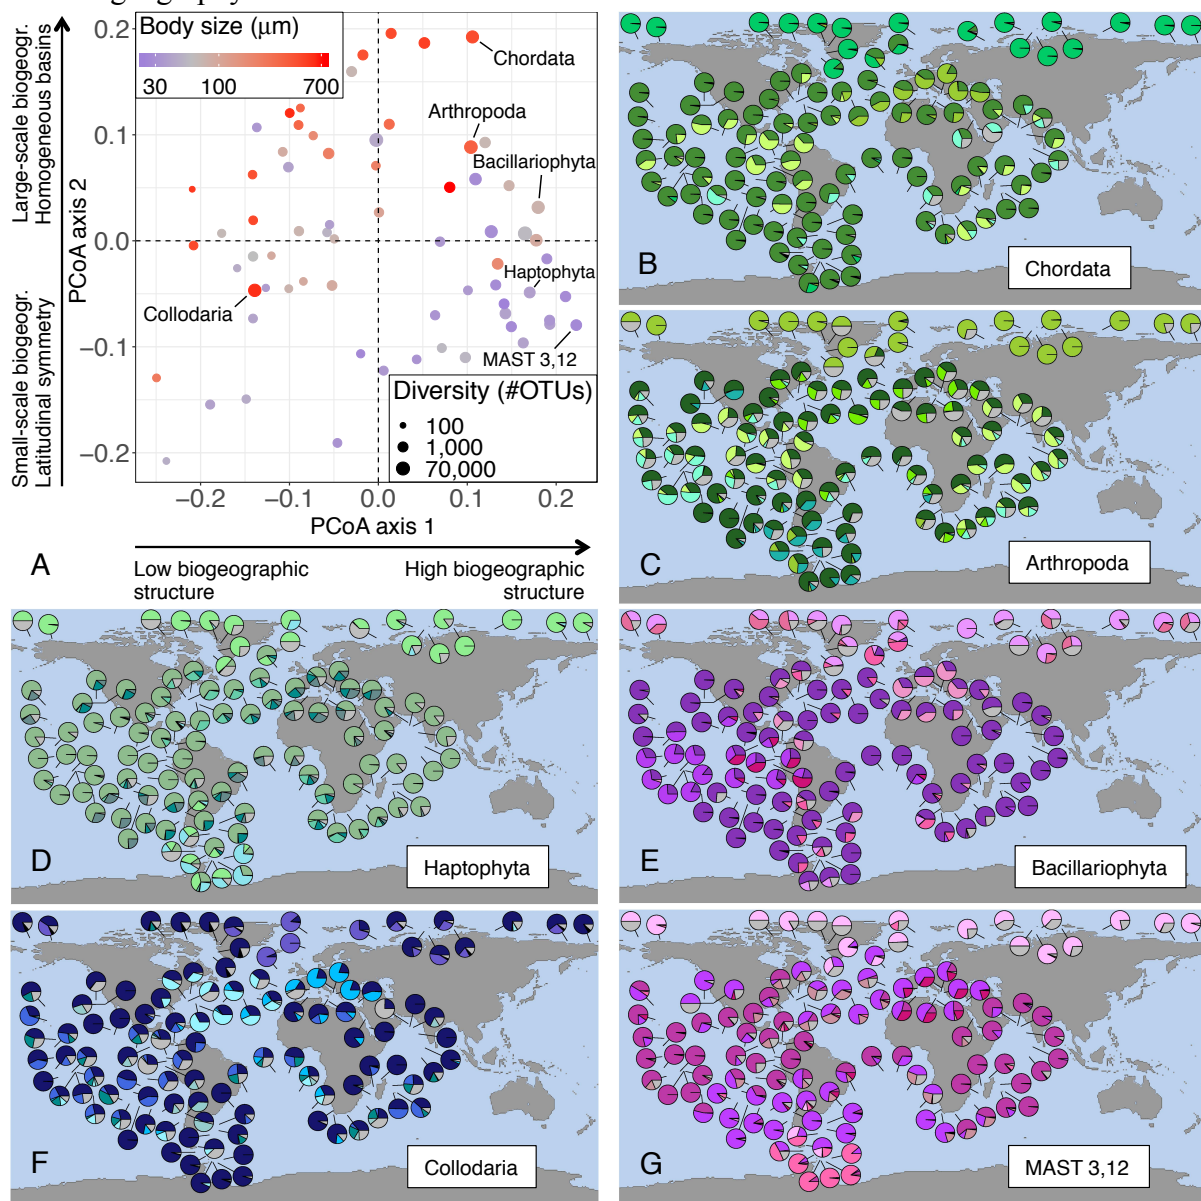

140  
141  
142 **Figure 2: Biogeographic heterogeneity across major eukaryotic plankton groups.** (A) Principal Coordinate  
143 Analysis (PCoA) of the biogeographic dissimilarity between 70 major groups of eukaryotic plankton. Each dot  
144 corresponds to the projection of a specific plankton group onto the first two axes of variation. Position along the  
145 first axis reflects the amount of biogeographic structure displayed by the group, from a patchy distribution with  
146 weak short-distance spatial autocorrelation on the left to a structured distribution with strong short-distance  
147 spatial autocorrelation on the right. Position along the second axis reflects the nature of biogeographic structure,  
148 from a biogeography structured by latitude at the bottom to a biogeography structured by oceanic basins at the  
149 top, as well as the scale of biogeographic organization, from small to large scale. Dot size is proportional to the  
150 log diversity of the corresponding group, and dot color represents its mean log body-size. (B-G) Surface  
151 biogeography of six major eukaryotic plankton groups. The relative contribution of the 5 to 7 most prevalent  
152 assemblages is shown in color, and that of the remaining assemblages is shown in gray; the color used for the  
153 most prevalent assemblage corresponds to the color used in Fig. 1B for the corresponding group.

154  
155 We investigated how biogeographic differences among major groups relate to their  
156 diversity, body size, and ecology, coarsely defined as either phototroph, phagotroph,

157 metazoan or parasite (Methods). We found that the amount of biogeographic structure (group  
158 position on the first axis) is strongly correlated to diversity ( $\rho = 0.77$ ,  $p = 10^{-13}$  below  
159 2,000 OTUs; Fig. 3A). This suggests that geographic structure could play a role in generating  
160 and maintaining eukaryotic plankton diversity over ecological and possibly evolutionary  
161 scales, for example by promoting allopatric speciation and endemism. This relationship  
162 vanishes however for groups larger than about 2,000 OTUs, and two of the most diverse  
163 groups (Diplonemida, 38,769 OTUs and Collodaria, 17,417 OTUs) exhibit comparatively  
164 weak biogeographic structure. The amount of biogeographic structure is weakly anticorrelated  
165 to body size ( $\rho = -0.32$ ,  $p = 0.007$ ; Fig. S6A), and after accounting for differences in  
166 diversity across groups, is lower for metazoans than for phototrophs (ANCOVA t-test:  
167  $p = 0.035$ , Fig. S6B), in agreement with the expectation of a higher local patchiness in their  
168 distribution induced by turbulent stirring (Abraham, 1998; Bertrand et al., 2014). In contrast,  
169 the nature of biogeographic structure (group position on the second axis) is strongly correlated  
170 to body size ( $\rho = 0.61$ ,  $p = 10^{-8}$ ; Fig. 3B) and ecology (ANOVA F-test:  $p = 10^{-6}$ , Fig.  
171 3C), and only weakly to diversity ( $\rho = 0.25$ ,  $p = 0.033$ ; Fig. S6C). Metazoan groups score  
172 high on the second axis of variation (with the notable exception of Porifera sponges, probably  
173 at the larval stage) and phototrophs score low, while phagotrophs occupy an intermediate  
174 position, spanning a comparatively wider range of biogeographies (Fig. 3C). Parasites are just  
175 below metazoans, which suggests that their biogeography is influenced by that of their hosts.  
176 While body size covaries with ecology (phagotrophs are larger than phototrophs on average,  
177 and metazoans significantly larger than other plankton types; Fig. S7), the positive  
178 relationship between group position on the second axis and body size still holds within each  
179 of the four ecological categories (ANCOVA F-test:  $p = 0.004$ ; Fig. S8). Diatoms  
180 (Bacillariophyta) are a striking example: of all phototrophs, they have the largest body size  
181 and also score highest on the second axis of variation. Conversely, ecology significantly  
182 influences group position on the second axis even after accounting for body size differences  
183 (ANCOVA F-test:  $p = 0.035$ ). Collodaria, which we did not assign to an ecological category,  
184 score lower than expected from their large body size, but close to the average for  
185 phagotrophic groups (Fig. 2, Table S1). These results suggest that biogeographic patterns are  
186 influenced by both body size and ecology. To summarize, diversity-rich groups are  
187 biogeographically structured, with large-bodied heterotrophs (metazoans such as Copepods  
188 and Tunicates) exhibiting biogeographic variations at the scale of oceanic basins or larger,  
189 and small-bodied phototrophs (such as Haptophyta) at smaller spatial scale and following  
190 latitude (Fig. 2).  
191

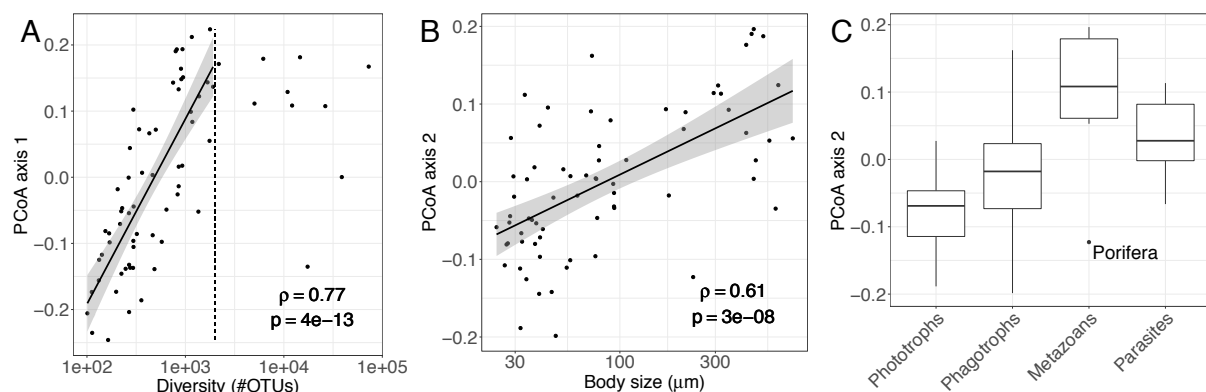

192  
193  
194 **Figure 3: Relationship between biogeography and diversity, mean body size and ecology across major**  
195 **eukaryotic plankton groups.** (A) The position of the 70 plankton groups along the first axis of biogeographic  
196 variation, indicative of the amount of biogeographic structure, increases sharply with log diversity (number of  
197 OTUs in the group) up to approximately 2,000 OTUs, but not beyond. (B) The position of the 70 plankton  
198 groups along the second axis, indicative of the nature and spatial scale of biogeographic structure, increases with  
199 log mean body size, indicating that large-bodied plankton is organized at larger spatial scale and according to

200 oceanic basins rather than latitude. (C) Positions along the second axis of plankton groups binned into four broad  
201 ecological categories. Pairwise differences are all significant except between Phagotrophs and Parasites.

202  
203 A global biogeography matching oceanic basins suggests that communities respond to  
204 environmental variations slowly enough to be homogenised by ocean circulation at the basin  
205 scale (i.e., gyres; Richter et al., 2019), but have little ability to disperse between basins, either  
206 due to the comparatively limited connectivity by currents or to environmental barriers, and  
207 therefore that their biogeography is primarily shaped by the main ocean currents (Hellweger  
208 et al., 2014). Conversely, a biogeography matching latitude, symmetric with respect to the  
209 Equator, suggests a faster response of communities to environmental variations within basins  
210 (which are structured by latitude and currents, e.g. the cross-latitude influence of the Gulf  
211 Stream), low cross-basin dispersal limitation, and therefore a comparatively more important  
212 role of local environmental filtering in shaping biogeography. We investigated the ability of  
213 transport by currents and local environmental conditions to explain the global biogeography  
214 of major taxonomic groups. We compared biogeographic maps to maps of connectivity by  
215 currents and environmental conditions. We transformed minimum transport times between  
216 pairs of stations, previously computed from a global ocean circulation model (Methods;  
217 Clayton et al., 2017; Richter et al., 2019), into a set of connectivity maps describing patterns  
218 of connectivity by currents at different temporal scales (Methods; Fig. S9, S10). These  
219 connectivity maps can be interpreted as the geographic patterns that would be expected for  
220 plankton transported by currents; more precisely, each map corresponds to a specific time  
221 scale, and can be interpreted as the geographic patterns that would be expected for plankton  
222 which temporal variation along currents match this scale. We estimated local abiotic  
223 conditions using yearly-averaged measurements of temperature, nutrient concentration and  
224 oxygen availability (World Ocean Atlas 2013; Boyer et al., 2013; cf. Methods). Because  
225 biotic interactions (predation, competition, parasitic and mutualistic symbiosis) are thought to  
226 be important determinants of plankton community structure (Lima-Mendez et al., 2015), we  
227 also quantified local biotic conditions using the relative read counts of major eukaryotic  
228 groups (excluding the focal group; cf. Methods). Biotic conditions, similarly to abiotic ones,  
229 have a latitudinal structure, and we refer here to them collectively as ‘environmental  
230 conditions’ (Fig. S11, S12). The resulting environmental maps can be interpreted as the  
231 geographic patterns that would be expected for organisms that are strongly responsive to local  
232 environmental conditions but whose dispersal by currents is not limiting. Hence, a  
233 biogeography matching connectivity maps better than environmental maps suggest that the  
234 constraints imposed by oceanic currents (the transport of the plankton across those regions,  
235 modulated by mixing, ecological drift and speciation, but also by responses to nutrient  
236 supplies and temperature variations) dominate over those imposed by local environmental  
237 conditions.

238 We found that the total variance in surface community composition that can be  
239 explained by connectivity patterns and local environmental conditions (abiotic and biotic)  
240 averages 34% across groups (min. 8% and max. 65%) and is, as expected, tightly correlated to  
241 the amount of biogeographic structure ( $\rho = 0.91$ ; Fig. 4A; Methods). The variance purely  
242 explained by connectivity patterns is for most groups larger than that purely explained by the  
243 local environment (40% versus 22% of explained variance on average at the surface; Fig. 4B-  
244 D, S13A), and is primarily contributed by between-basin connectivity patterns (Fig. S10 &  
245 S14). This supports a prominent role of transport by the main current systems and of the  
246 processes occurring along those pathways in shaping eukaryotic plankton biogeography, both  
247 by extending the distribution of some taxa beyond their optimal range (Dutkiewicz et al.,  
248 2019) and by constraining long-distance dispersal. We note that unmeasured environmental  
249 variations along currents likely contribute to this role of ocean circulation. As expected from  
250 our previous results, the ratio of the fractions of variance purely explained by connectivity  
251 patterns and the local environment, which reflects their relative contributions to  
252 biogeography, increases with group position on the second axis of variation ( $\rho = 0.32$ ,

253  $p = 0.008$ ; Fig. 4B). Accordingly, the relative contribution of connectivity by currents also  
 254 increases with average group body size ( $\rho = 0.42$ ,  $p = 3.10^{-4}$ ; Fig. 4C) and depends on  
 255 ecology (ANOVA F-test:  $p = 0.037$ ; Fig. 4D). These results indicate that metazoans are  
 256 closer to freely drifting tracers strongly influenced by currents, and constrained in particular  
 257 by limited between-basin connectivity, while phototrophs are more strongly coupled with  
 258 environmental factors and disperse more readily between basins. The difference in sensitivity  
 259 to local environmental conditions can be explained by differences in ecological requirements  
 260 and community dynamics. Why there is a difference in between-basins dispersal is less clear.  
 261 All basins are connected by currents within a few years of transport time (Jönsson & Watson,  
 262 2016), and small phototrophs may have a higher ability to disperse through environmental  
 263 barriers by forming spores or dormant states (Finlay, 2002). Alternatively, the looser  
 264 environmental coupling and slower dynamics of metazoan communities might make them  
 265 more sensitive to the smaller between-basin compared to within-basin water flow. Finally,  
 266 within the variance explained by the local environment, the contribution of pure biotic  
 267 conditions largely dominates that of pure abiotic conditions for most groups (47% versus 16%  
 268 on average at the surface; Fig. S13B), irrespective of their body size, ecology, diversity or  
 269 biogeography (Fig. S15). Results are similar at the DCM, but are far less pronounced (Fig.  
 270 S16, S17). Although we cannot exclude the possibility that local biotic conditions reflect the  
 271 indirect effect of local abiotic factors that are not accounted for in our study, such as fluxes of  
 272 nutrients, which are often more relevant to planktonic organisms than instantaneous nutrient  
 273 concentrations (Dutkiewicz et al., 2019), these results indicate an additional role for  
 274 interspecific interactions in shaping community composition (Lima-Mendez et al., 2015;  
 275 Vincent & Bowler, 2020).  
 276

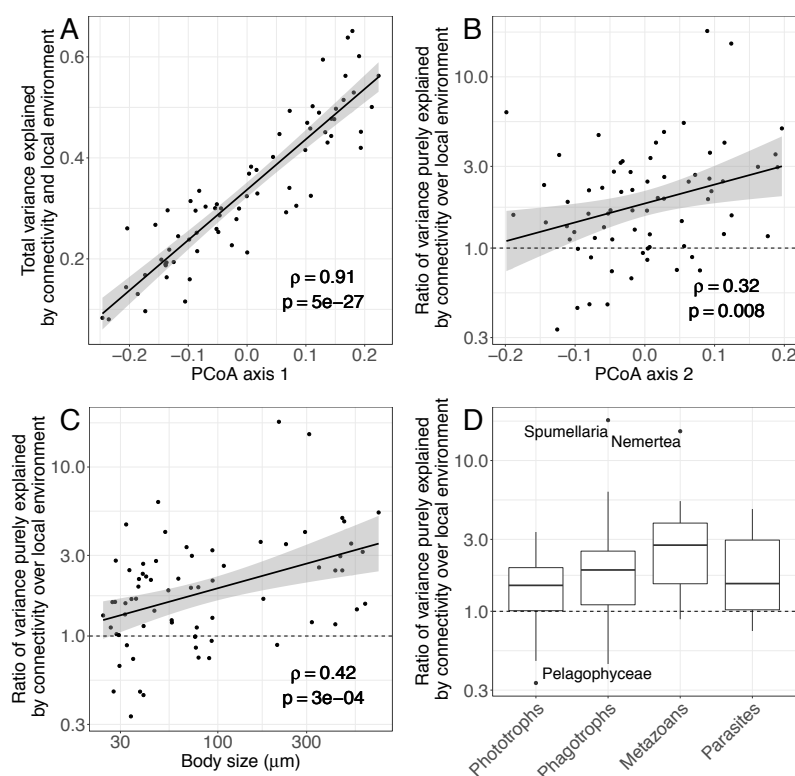

277  
 278  
 279 **Figure 4: Drivers of surface biogeography across major eukaryotic plankton groups.** (A) The total variance  
 280 in surface biogeography that can be explained by the combination of connectivity by currents and (abiotic and  
 281 biotic) local environmental conditions increases with the position of plankton groups on the first axis of  
 282 biogeographic variation. (B-D) Across major plankton groups, the log ratio of the variance explained purely by  
 283 connectivity over the variance explained purely by (abiotic and biotic) local environmental conditions (B)  
 284 increases with group position on the second axis of variation, (C) increases with mean body size, and (D) varies  
 285 across broad ecological categories (only the pairwise difference between Phototrophs and Metazoans is

286 significant). The ratio is higher than 1 for most groups, reflecting an overall stronger influence of connectivity by  
287 currents compared to local environmental conditions on plankton biogeography at the surface.  
288

289 Our study clarifies the patterns and processes underlying the global biogeography of  
290 the main groups of eukaryotic plankton in the sunlit ocean. Consistent with the recently  
291 proposed concept of seascape (Kavanaugh et al., 2016), we find that community variation  
292 along currents is slow enough to allow currents to be the dominant driver of global-scale  
293 biogeography (Richter et al., 2019). The continuous movement of water masses generates  
294 biogeographic patterns that are better represented by overlapping taxa assemblages than by  
295 the well-delineated biomes characteristic of terrestrial systems. Our comparison of eukaryotic  
296 plankton groups reveals several additional results. First, the geographic structuring induced by  
297 currents may have favored the generation and maintenance of eukaryotic plankton diversity.  
298 Second, plankton ecology matters beyond body size differences, and reciprocally body size  
299 matters beyond ecological differences. Third, body size and ecology influence primarily the  
300 nature of biogeographic patterns, namely their spatial scale of organization and whether they  
301 are organized by oceanic basins or latitude, and only secondarily the amount of biogeographic  
302 structure, namely local patchiness. Fourth, biotic conditions appear to be a more important  
303 driver of biogeography than local abiotic conditions. Our results reconcile the views that  
304 larger-bodied organisms are more dispersal-limited (Finlay, 2002; Villarino et al., 2018) and  
305 yet display a slower compositional turnover along currents than smaller organisms (Richter et  
306 al., 2019): at the global scale, organisms of larger sizes are indeed more dispersal-limited;  
307 however at the regional scale, they have wider spatial distributions, presumably linked to their  
308 specific ecologies, longer lifespan and reduced sensitivity to local environmental variations.  
309 At the two extremes, metazoan heterotrophs are structured at the scale of oceanic basins  
310 following the main currents, while small phototrophs are structured latitudinally with a  
311 comparatively larger influence of local environmental conditions, predominantly biotic ones.  
312 Together, our results suggest that predictive modeling of plankton communities in a changing  
313 environment (Ibarbalz et al., 2019; Lotze et al., 2019) will critically depend on our ability to  
314 model the impact of changes in ocean currents and to develop niche models accounting for  
315 both species ecology and interspecific interactions.  
316



317 **Acknowledgements:**

318

319 We are grateful to Federico Ibarbalz for his essential help with the data. We thank Olivier  
320 Jaillon and Colombar de Vargas for feedback and early discussions on the project. We thank  
321 Mick Follows and Oliver Jahn for sharing MITgcm simulation results for the Arctic Ocean.  
322 We thank Florian Hartig and Odile Maliet for their precious advice on Bayesian inference,  
323 Leandro Arístide and Felipe Delestro for their kind assistance with the figures, and Carmelo  
324 Fruciano and Benoît Perez for their guidance on statistics. We thank Leandro Arístide, Fabio  
325 Benedetti, Julien Clavel, Carmelo Fruciano, Elena Kazamia, Sophia Lambert, Eric Lewitus,  
326 Odile Maliet, Marc Manceau, Olivier Missa, Silvia de Monte, Isaac Overcast, Benoît Perez,  
327 Ignacio Quintero, Enrico Ser-Giacomi, Ana Catarina Silva and Flora Vincent for suggestions  
328 and fruitful discussions.

329 This work was supported by *European Research Council* grants (ERC 616419-  
330 PANDA, to H.M.; ERC 835067-DIATOMIC, to C.B.), grants from the French *Agence*  
331 *Nationale de la Recherche* (MEMOLIFE, ref. ANR-10-LABX-54, to G.S.K., H.M. and C.B.;  
332 OCEANOMICS, ref. ANR-11-BTBR-0008, to C.B.) and funds from CNRS. C.B. and H.M.  
333 are members of the Research Federation for the study of Global Ocean Systems Ecology and  
334 Evolution, FR2022/Tara Oceans GOSEE. This article is contribution number XXX of *Tara*  
335 Oceans.

336 **References:**

- 337
- 338 Abraham, E. R. (1998). The generation of plankton patchiness by turbulent stirring. *Nature*,
- 339 *391*(6667), 577–580. doi: 10.1038/35361
- 340 Beaugrand, G., & Kirby, R. R. (2018). How Do Marine Pelagic Species Respond to Climate
- 341 Change? Theories and Observations. *Annual Review of Marine Science*, *10*(1), 169–
- 342 197. doi: 10.1146/annurev-marine-121916-063304
- 343 Bertrand, A., Grados, D., Colas, F., Bertrand, S., Capet, X., Chaigneau, A., ... Fablet, R.
- 344 (2014). Broad impacts of fine-scale dynamics on seascape structure from zooplankton
- 345 to seabirds. *Nature Communications*, *5*(1), 1–9. doi: 10.1038/ncomms6239
- 346 Boyer, T. P., Antonov, J. I., Baranova, O. K., Coleman, C., Garcia, H. E., Grodsky, A., ...
- 347 O'Brien, T. D. (2013). *World Ocean Database 2013*.
- 348 Clayton, S., Dutkiewicz, S., Jahn, O., Hill, C., Heimbach, P., & Follows, M. J. (2017).
- 349 Biogeochemical versus ecological consequences of modeled ocean physics.
- 350 *Biogeosciences*, *14*(11), 2877–2889. doi: 10.5194/bg-14-2877-2017
- 351 de Vargas, C., Audic, S., Henry, N., Decelle, J., Mahe, F., Logares, R., ... Tara Oceans, C.
- 352 (2015). Eukaryotic plankton diversity in the sunlit ocean. *Science*, *348*(6237).
- 353 (WOS:000354877900034). doi: 10.1126/science.1261605
- 354 Dutkiewicz, S., Cermeno, P., Jahn, O., Follows, M. J., Hickman, A. E., Taniguchi, D. A. A.,
- 355 & Ward, B. A. (2019). Dimensions of Marine Phytoplankton Diversity.
- 356 *Biogeosciences Discussions*, 1–46. doi: <https://doi.org/10.5194/bg-2019-311>
- 357 Ficetola, G. F., Mazel, F., & Thuiller, W. (2017). Global determinants of zoogeographical
- 358 boundaries. *Nature Ecology and Evolution*. doi: 10.1038/s41559-017-0089
- 359 Field, C. B., Behrenfeld, M. J., Randerson, J. T., & Falkowski, P. (1998). Primary production
- 360 of the biosphere: integrating terrestrial and oceanic components. *Science*, *281*(5374),
- 361 237–240.
- 362 Finlay, B. J. (2002). Global Dispersal of Free-Living Microbial Eukaryote Species. *Science*,
- 363 *296*(5570), 1061–1063. doi: 10.1126/science.1070710
- 364 Hellweger, F. L., van Sebille, E., & Fredrick, N. D. (2014). Biogeographic patterns in ocean
- 365 microbes emerge in a neutral agent-based model. *Science*.
- 366 Ibarbalz, F. M., Henry, N., Brandão, M. C., Martini, S., Busseni, G., Byrne, H., ... Zinger, L.
- 367 (2019). Global Trends in Marine Plankton Diversity across Kingdoms of Life. *Cell*,
- 368 *179*(5), 1084-1097.e21. doi: 10.1016/j.cell.2019.10.008
- 369 Jönsson, B. F., & Watson, J. R. (2016). The timescales of global surface-ocean connectivity.
- 370 *Nature Communications*, *7*, 11239. doi: 10.1038/ncomms11239
- 371 Kavanaugh, M. T., Oliver, M. J., Chavez, F. P., Letelier, R. M., Muller-Karger, F. E., &
- 372 Doney, S. C. (2016). Seascapes as a new vernacular for pelagic ocean monitoring,
- 373 management and conservation. *ICES Journal of Marine Science*, *73*(7), 1839–1850.
- 374 doi: 10.1093/icesjms/fsw086
- 375 Lévy, M., Jahn, O., Dutkiewicz, S., & Follows, M. J. (2014). Phytoplankton diversity and
- 376 community structure affected by oceanic dispersal and mesoscale turbulence.
- 377 *Limnology and Oceanography: Fluids and Environments*, *4*(1), 67–84. doi:
- 378 10.1215/21573689-2768549
- 379 Lima-Mendez, G., Faust, K., Henry, N., Decelle, J., Colin, S., Carcillo, F., ... Tara Oceans, C.
- 380 (2015). Determinants of community structure in the global plankton interactome.
- 381 *Science*, *348*(6237), 9. (WOS:000354877900035). doi: 10.1126/science.1262073
- 382 Lotze, H. K., Tittensor, D. P., Bryndum-Buchholz, A., Eddy, T. D., Cheung, W. W. L.,
- 383 Galbraith, E. D., ... Worm, B. (2019). Global ensemble projections reveal trophic
- 384 amplification of ocean biomass declines with climate change. *Proceedings of the*
- 385 *National Academy of Sciences of the United States of America*, *116*(26), 12907–12912.
- 386 doi: 10.1073/pnas.1900194116
- 387 Madoui, M.-A., Poulain, J., Sugier, K., Wessner, M., Noel, B., Berline, L., ... Wincker, P.

- 388 (2017). New insights into global biogeography, population structure and natural  
389 selection from the genome of the epipelagic copepod *Oithona*. *Molecular Ecology*,  
390 26(17), 4467–4482. doi: 10.1111/mec.14214
- 391 Mahé, F., Rognes, T., Quince, C., Vargas, C. de, & Dunthorn, M. (2014). Swarm: robust and  
392 fast clustering method for amplicon-based studies. *PeerJ*, 2, e593. doi:  
393 10.7717/peerj.593
- 394 Meila, M. (2006). Comparing clusterings—an information based distance. *Journal of*  
395 *Multivariate Analysis*, 98(5), 873–895.
- 396 Oziel, L., Baudena, A., Ardyna, M., Massicotte, P., Randelhoff, A., Sallée, J.-B., ... Babin,  
397 M. (2020). Faster Atlantic currents drive poleward expansion of temperate  
398 phytoplankton in the Arctic Ocean. *Nature Communications*, 11(1), 1–8. doi:  
399 10.1038/s41467-020-15485-5
- 400 Raes, E. J., Bodrossy, L., van de Kamp, J., Bissett, A., Ostrowski, M., Brown, M. V., ...  
401 Waite, A. M. (2018). Oceanographic boundaries constrain microbial diversity  
402 gradients in the South Pacific Ocean. *Proceedings of the National Academy of*  
403 *Sciences*, 115(35), E8266–E8275. doi: 10.1073/pnas.1719335115
- 404 Richter, D. J., Watteaux, R., Vannier, T., Leconte, J., Frémont, P., Reygondeau, G., ...  
405 Coordinators, T. O. (2019). Genomic evidence for global ocean plankton  
406 biogeography shaped by large-scale current systems. *BioRxiv*, 867739. doi:  
407 10.1101/867739
- 408 Righetti, D., Vogt, M., Gruber, N., Psomas, A., & Zimmermann, N. E. (2019). Global pattern  
409 of phytoplankton diversity driven by temperature and environmental variability.  
410 *Science Advances*, 5(5), eaau6253. doi: 10.1126/sciadv.aau6253
- 411 Sommeria-Klein, G., Zinger, L., Coissac, E., Iribar, A., Schimann, H., Taberlet, P., & Chave,  
412 J. (2019). Latent Dirichlet Allocation reveals spatial and taxonomic structure in a  
413 DNA-based census of soil biodiversity from a tropical forest. *Molecular Ecology*  
414 *Resources*. doi: 10.1111/1755-0998.13109
- 415 Talley, L. D. (2011). *Descriptive physical oceanography: an introduction*. Academic press.
- 416 Tittensor, D. P., Mora, C., Jetz, W., Lotze, H. K., Ricard, D., Berghe, E. V., & Worm, B.  
417 (2010). Global patterns and predictors of marine biodiversity across taxa. *Nature*,  
418 466(7310), 1098–1101. doi: 10.1038/nature09329
- 419 Valle, D., Baiser, B., Woodall, C. W., & Chazdon, R. (2014). Decomposing biodiversity data  
420 using the Latent Dirichlet Allocation model, a probabilistic multivariate statistical  
421 method. *Ecology Letters*, 17(12), 1591–1601. (WOS:000345216200012). doi:  
422 10.1111/ele.12380
- 423 Villarino, E., Watson, J. R., Jönsson, B., Gasol, J. M., Salazar, G., Acinas, S. G., ... Chust, G.  
424 (2018). Large-scale ocean connectivity and planktonic body size. *Nature*  
425 *Communications*, 9(1), 142. doi: 10.1038/s41467-017-02535-8
- 426 Vincent, F., & Bowler, C. (2020). Diatoms Are Selective Segregators in Global Ocean  
427 Planktonic Communities. *MSystems*, 5(1). doi: 10.1128/mSystems.00444-19
- 428 Wallace, A. R. (1876). *The geographical distribution of animals: with a study of the relations*  
429 *of living and extinct faunas as elucidating the past changes of the earth's surface* (Vol.  
430 1). Cambridge University Press.
- 431 Worden, A. Z., Follows, M. J., Giovannoni, S. J., Wilken, S., Zimmerman, A. E., & Keeling,  
432 P. J. (2015). Rethinking the marine carbon cycle: Factoring in the multifarious  
433 lifestyles of microbes. *Science*, 347(6223), 1257594. doi: 10.1126/science.1257594  
434  
435

436 **Methods:**

437

438 *DNA data processing*

439 Planktonic organisms were sampled in 129 stations of the open ocean (no lagoon or coastal  
440 waters) covering the Arctic, Atlantic, Indian, East Pacific and Southern Oceans as well as the  
441 Mediterranean and Red Seas. Samples were collected from subsurface mixed-layer waters  
442 (henceforth referred to as ‘surface’, about 5 m deep). In about half of the stations, samples  
443 were additionally collected at the Deep Chlorophyll Maximum (‘DCM’, ranging from 20 m to  
444 190 m deep, most commonly around 40 m deep). At both depth levels, four different fractions  
445 of organisms’ body size were collected: 0.8-5 mm, 5-20 mm (or 3-20 mm in some stations,  
446 which we treated as equivalent), 20-180 mm, and 180-2000 mm. In Arctic stations, a small  
447 size fraction without upper size limit (0.8 mm – infinity) was collected in place of the 0.8-5  
448 mm size fraction. We treated both fractions as equivalent, since they were found to be of  
449 similar composition in stations where both were collected (indeed, small organisms greatly  
450 outnumber larger ones).

451 Whole DNA was extracted from these samples, then the V9 region of the gene coding  
452 for the eukaryotic 18S rRNA was PCR-amplified and the resulting amplicons were sequenced  
453 by Illumina sequencing. Sequencing reads were trimmed for quality, length and fidelity of  
454 primer sequences, then clustered into Operational Taxonomic Units (henceforth ‘OTUs’)  
455 using the SWARM unsupervised algorithm (Mahé, Rognes, Quince, Vargas, & Dunthorn,  
456 2014). OTUs were given taxonomic assignments by matching their most abundant sequence  
457 to a custom database derived from the Protist Ribosomal Reference (PR2; Guillou et al.,  
458 2013). OTUs with less than 80% similarity to the closest reference sequence were discarded,  
459 as well as OTUs matching non-eukaryotic reference sequences. This pipeline resulted in a list  
460 of OTUs and their associated read count for each sample. See de Vargas et al. (2015) for  
461 further detail on the sampling, wetlab and bioinformatics protocols. Taxonomic assignments  
462 of OTUs were then used to obtain ecological annotations based on literature, from which  
463 OTUs could be broadly classified into parasites, phototrophs, phagotrophs and metazoans  
464 (Ibarbalz et al., 2019).

465 For every station and depth, we pooled the results obtained for the four size fractions  
466 into a single aggregated sample (henceforth simply referred to as a ‘sample’). We discarded  
467 the samples where one or more size fractions were missing so as not to bias the results. This  
468 treatment resulted in retaining 113 stations, broken down into 110 surface samples and 62  
469 DCM samples and encompassing 250,057 OTUs.

470

471 *Characterizing samples as mixtures of assemblages using Latent Dirichlet Allocation*

472 To capture the spatial patterns of OTU co-occurrence across samples, we used a model-based  
473 algorithm of dimensionality reduction, Latent Dirichlet Allocation (LDA; Blei, Ng, & Jordan,  
474 2003). We considered that an OTU occurs in a sample when it is represented by at least one  
475 sequence read, and we discarded read count information. The method consists in fitting a so-  
476 called mixed membership model to the list of OTU occurrences in each sample (i.e., the  
477 community matrix). Even though the model formally assumes that OTUs can be observed  
478 several times in each sample (i.e., it assumes discrete abundance data rather than presence-  
479 absence data), this does not impair model fitting and interpretation for presence-absence data  
480 (Sommeria-Klein et al., 2019). The model assumes that OTU occurrences are sampled from a  
481 mixture of several (unobserved) assemblages. Each assemblage represents a set of OTUs that  
482 tend to co-occur across samples. The fitting process consists in inferring the  $K$  most likely  
483 assemblages from the data, where the number  $K$  of assemblages is fixed beforehand.  
484 Assemblages are defined by their OTU composition, both in terms of OTU identity and  
485 relative prevalence. The relative prevalence of an OTU in an assemblage is proportional to its  
486 number of occurrences across the samples where the assemblage is present. Assemblages may  
487 share OTUs, and samples may contain a mixture of coexisting assemblages. As a consequence

488 the model is able to capture spatial patterns despite the presence of many ubiquitous OTUs, a  
489 typical trait of microbial communities, and to accommodate gradual changes in taxonomic  
490 composition across space. The model is little influenced by OTUs of rare occurrence, since  
491 those OTUs contribute little co-occurrence information. Symmetric Dirichlet priors are put on  
492 the mixture of assemblages in samples and on the mixture of OTUs in assemblages, with  
493 respective control parameters  $a$  and  $d$ .

494 We fitted the model to all samples simultaneously, making no distinction between  
495 surface and DCM samples. We used the Gibbs sampling algorithm of Phan et al. (2008),  
496 wrapped in the R package ‘topicmodels’ (Grün & Hornik, 2011), with control parameters  
497  $\alpha = 0.1$  and  $\delta = 0.1$ . Values of  $a$  and  $d$  lower than 1 favor low spatial overlap and few shared  
498 OTUs between assemblages, respectively. Model output is chiefly influenced by  $d$ : values of  
499  $d$  close to 1 or higher led to solutions where very few widely distributed assemblages shared  
500 the bulk of OTUs. These solutions were associated with lower predictive power on held-out  
501 data (as measured by perplexity; see next paragraph) and lower posterior probability  
502 compared to lower  $d$  values. We ran the MCMC (Markov Chain Monte Carlo) chains for  
503 3,000 iterations starting from random assemblages. After the first 2,000 iterations (burn-in),  
504 we recorded samples every 25 iterations for the last 1,000 iterations (i.e., 40 MCMC samples  
505 per chain). MCMC samples are sets of values for all the model’s latent variables, which  
506 follow the model’s posterior distribution given the data once the chain has converged. The  
507 associated likelihood values are computed as part of the algorithm. Among the 40 MCMC  
508 samples, we picked that with likelihood closest to the mean across samples, as a proxy for the  
509 set of latent variable values maximizing the posterior distribution.

510 We selected the optimal number  $K$  of assemblages by cross-validation. We partitioned  
511 the data into random sets of 10 samples, and fitted the model on the data while successively  
512 holding out each 10-sample validation set. We then measured the predictive power of each  
513 fitted model on the corresponding validation set. We measured it using perplexity, a  
514 decreasing function of predictive power defined as the geometric mean of the likelihood  
515 across OTU occurrences (*perplexity* function in R package ‘topicmodels’; Grün & Hornik,  
516 2011). We compared the mean perplexity across validation sets for  $K$  between 2 and 35, and  
517 picked the minimum value after smoothing the curve with a 6-degree-of-freedom spline  
518 (function *smooth.spline*, R package ‘stats’; R Core Team, 2018). For large datasets, the mean  
519 perplexity as a function of  $K$  may enter a plateau after an initial decrease (Fig. S1). As a  
520 heuristic means to select the  $K$  value corresponding to the onset of the plateau, we first fitted  
521 the model to the whole dataset for the  $K$  value with minimum mean perplexity, and used the  
522 number of assemblages obtained after removing all the assemblages with a cumulative  
523 prevalence across the dataset of less than one sample. We then fitted the model again for the  
524 number of assemblages thus obtained.

525 Once we had selected the  $K$  value, we ran 100 independent MCMC chains on the  
526 whole dataset from random initial conditions. To check for potential insufficient mixing along  
527 the chains, we measured the similarity in the spatial distribution of assemblages across the  
528 chains (Table S1), using the metric defined in Sommeria-Klein et al. (2019). We picked the  
529 chain with posterior probability closest to the mean across chains for the final interpretation.

### 530 531 *Comparing assemblages*

532 Each assemblage is characterized by a list of OTUs and their relative prevalence. When  
533 running LDA on the whole eukaryotic data set, we measured the pairwise dissimilarity  
534 between assemblages as the Simpson dissimilarity of their composition in OTUs. We then  
535 built an UPGMA tree out of the dissimilarity matrix to obtain a hierarchical clustering of  
536 assemblages (function *agnes*, R package ‘cluster’).

537  
538  
539

540 *Major eukaryotic groups*

541 After having first considered all eukaryotic OTUs combined, we sought to compare  
 542 biogeographic patterns across major groups of eukaryotic plankton. To this end, we classified  
 543 OTUs into deep-branching monophyletic groups based on taxonomic assignments, as in de  
 544 Vargas et al. (2015), and we discarded those tallying less than 100 OTUs. We obtained 70  
 545 groups tallying between 101 to 72,769 OTUs (Dinophyceae), for a total of 241,020 OTUs.

546 We classified eukaryotic groups into four broad ecological categories based on the  
 547 dominant ecology of their constituent OTUs: parasites, phototrophs, phagotrophs and  
 548 metazoans. All groups fell entirely or mostly into one of these categories, except Dinophyceae  
 549 (various ecological functions, including many mixotrophs) and Collodaria (mostly  
 550 phagotrophic photohosts), which we did not classify and thus excluded from our statistical  
 551 comparisons to ecology.

552 We estimated the mean body size of each group based on the distribution of the  
 553 corresponding sequence reads over the four size fractions and across samples. Specifically,  
 554 we computed the mean body size  $\langle d_G \rangle$  of group  $G$  across samples as:

$$\langle d_G \rangle = \frac{1}{S} \sum_{i=1}^S \frac{\sum_{f=1}^4 \sum_{t \in G} p_{t,f,i} d_f}{\sum_{f=1}^4 \sum_{t \in G} p_{t,f,i}}$$

555 where  $S$  is the number of samples,  $d_f$  the mid-range body size of fraction  $f$  (i.e., respectively  
 556 2.9 mm, 12.5 mm, 100 mm, and 1,090 mm for the four size fractions), and  
 557  $p_{t,f,s} = n_{t,f,i} / \sum_t n_{t,f,i}$  the relative abundance of OTU  $t$  in fraction  $f$  of sample  $i$ , as inferred  
 558 from the number  $n_{t,f,i}$  of sequence reads assigned to it. Groups' mean body size ranges from  
 559 24 mm (Cryptophyta) to 731 mm (Chaetognatha).

560 Groups diversity and body size are independent from each other ( $p = 0.25$ ), but  
 561 variation in body size partly overlaps with ecological categories: all pairs of ecological  
 562 categories have significantly distinct body size except parasites and phagotrophs (Fig. S7).

563  
 564 *Amount of biogeographic structure*

565 To quantify the amount of biogeographic structure exhibited by a planktonic group, we  
 566 computed, separately for surface and DCM samples, the short-distance spatial autocorrelation  
 567  $I_k$  in the global distribution of each assemblage  $k$  across stations. We measured  $I_k$  using  
 568 Moran's index (function Moran.I, R package 'ape'; Paradis & Schliep, 2018), defined as:

$$I_k = \frac{S}{\sum_{i=1}^S \sum_{j=1}^S w_{ij}} \frac{\sum_{i=1}^S \sum_{j=1}^S w_{ij} (\theta_i^k - \langle \theta^k \rangle) (\theta_j^k - \langle \theta^k \rangle)}{\sum_{i=1}^S (\theta_i^k - \langle \theta^k \rangle)^2}$$

569 where  $S$  is the number of stations,  $\theta_i^k$  the proportion of assemblage  $k$  in station  $i$  (i.e.,  
 570  $\sum_{k=1}^K \theta_i^k = 1$ ),  $\langle \theta^k \rangle = \sum_{i=1}^S \theta_i^k / S$  its mean over stations, and  $w_{ij} = w(d_{ij})$  is a weight  
 571 function that decreases with the spatial distance  $d_{ij}$  between stations  $i$  and  $j$ . We defined the  
 572 spatial distance between two stations as the shortest path between them that follows Earth's  
 573 surface without crossing land (Dijkstra's algorithm; Richter et al., 2019). We chose an  
 574 inverse-square weight function satisfying  $w(\max d_{ij}) = 0$  and  $w(\min d_{ij}) = 1$ :

$$w_{ij} = w(d_{ij}) = \frac{\left(\frac{\max d_{ij}}{d_{ij}}\right)^2 - 1}{\left(\frac{\max d_{ij}}{\min d_{ij}}\right)^2 - 1}$$

575 where  $\min d_{ij}$  is about 100 km and  $\max d_{ij}$  23,500 km. We then computed the overall short-  
 576 distance spatial autocorrelation  $I$  in the biogeography as the weighted mean of  $I_k$  over  
 577 assemblages, using the mean assemblage proportions  $\langle \theta^k \rangle$  as weights, separately for the  
 578 surface and the DCM:

$$I = \sum_{k=1}^K \langle \theta^{\square} \rangle I_k$$

579

### 580 *Scale of biogeographic organization*

581 We quantified the scale of biogeographic organization as the characteristic distance at which  
582 spatial autocorrelation vanishes. We measured this distance in surface and at the DCM by  
583 computing Moran's I with a step weight function taking value  $w_{ij} = 1$  if  $d_{ij} < d$  and  $w_{ij} = 0$   
584 otherwise, and by varying  $d$  linearly between  $mind_{ij}$  and  $maxd_{ij}$  over 20 increments:  
585  $d^n = mind_{ij} + n(maxd_{ij} - mind_{ij})/20$  for  $n$  between 1 and 20. Moran's I decreases first  
586 linearly with spatial distance  $d$  and then vanishes asymptotically. We smoothed the  $I(d)$   
587 curve with a 5-degree-of-freedom spline, and then performed a linear regression (function *lm*,  
588 R package 'stats') on its linear domain. We defined the characteristic distance at which spatial  
589 autocorrelation vanishes as the x-axis intercept of the linear regression (i.e.,  $-b/a$ , where  $a$   
590 and  $b$  are the slope and y-axis intercept, respectively).

591

### 592 *Autocorrelation within oceanic basins*

593 We measured the spatial autocorrelation within oceanic basins by computing Moran's I with a  
594 step weight function taking value  $w_{ij} = 1$  when stations  $i$  and  $j$  belong to the same oceanic  
595 basin and  $w_{ij} = 0$  otherwise, separately at the surface and the DCM. We defined as separate  
596 oceanic basins the Arctic Ocean, North Atlantic Ocean, South Atlantic Ocean, Mediterranean  
597 Sea, Red Sea, Indian Ocean, North Pacific Ocean, South Pacific Ocean and Southern Ocean.  
598 We expect a correlation between short-distance and within-basin spatial autocorrelation, since  
599 both are computed as Moran's I using different weight functions. To take this into account,  
600 we divided for each group the within-basin autocorrelation by the short-distance  
601 autocorrelation in statistical analyses.

602

### 603 *Latitudinal autocorrelation*

604 To measure whether the same assemblages tend occur at the same absolute latitude on both  
605 sides of the Equator, we computed, separately at the surface and the DCM, Moran's I with a  
606 weight function taking value  $w_{ij} = e^{-(|l_i - l_j|)^2 / \sigma^2}$  when  $sign(l_i) = -sign(l_j)$  and  $w_{ij} = 0$   
607 otherwise, where  $l_i$  is the latitude of station  $i$  in degrees. We used  $\sigma^2 = 25$ , the value that  
608 maximized latitudinal autocorrelation in the surface biogeography of all eukaryotic OTUs  
609 combined. As for within-basin autocorrelation, we divided for each group the latitudinal  
610 autocorrelation by the short-distance autocorrelation in statistical analyses.

611

### 612 *Comparing biogeography across groups*

613 We applied our LDA decomposition pipeline (see above) separately to each of the major  
614 groups. To compare the resulting biogeography across groups, we computed a measure of  
615 biogeographic dissimilarity between pairs of groups. We used the relative mutual information  
616 between the spatial distribution of assemblages, an information theoretic quantity closely  
617 related to the Variation of Information (Meila, 2006) but normalized by total entropy so as to  
618 make it insensitive to differences in number of assemblages between groups.

619 We note  $\theta_1 = (\theta_{1,i}^{k_1})_{i \in [1,S]}^{k_1 \in [1,K_1]}$  and  $\theta_2 = (\theta_{2,i}^{k_2})_{i \in [1,S]}^{k_2 \in [1,K_2]}$  the spatial distribution over the

620  $S$  stations of the respectively  $K_1$  and  $K_2$  assemblages in the biogeographies of groups 1 and 2,

621 with  $\sum_{k_1=1}^{K_1} \theta_{1,i}^{k_1} = 1$  and  $\sum_{k_2=1}^{K_2} \theta_{2,i}^{k_2} = 1$  for every station  $i$ . We computed the entropy  $H(\theta_j)$

622 and the mutual information  $I(\theta_1, \theta_2)$  between  $\theta_1$  and  $\theta_2$  as:

$$H(\theta_j) = - \sum_{k_j=1}^{K_j} \langle \theta^{k_j} \rangle \log \langle \theta^{k_j} \rangle$$

$$I(\theta_1, \theta_2) = \sum_{\{k_1, k_2\} \in \llbracket 1, K_1 \rrbracket \times \llbracket 1, K_2 \rrbracket} \langle \theta_1^{k_1} \theta_2^{k_2} \rangle \log \frac{\langle \theta_1^{k_1} \theta_2^{k_2} \rangle}{\langle \theta_1^{k_1} \rangle \langle \theta_2^{k_2} \rangle}$$

623 where  $\langle . \rangle$  stands for the mean over the  $S$  stations. The relative mutual information between  $\theta_1$   
624 and  $\theta_2$  is then defined as:

$$\mathcal{I}(\theta_1, \theta_2) = \frac{I(\theta_1, \theta_2)}{H(\theta_1) + H(\theta_2) - I(\theta_1, \theta_2)}$$

625 The similarity index  $\mathcal{I}(\theta_1, \theta_2)$  varies between 0 and 1, and can be transformed into a  
626 dissimilarity index by taking  $1 - \mathcal{I}(\theta_1, \theta_2)$ .

627 We performed a Principal Coordinate Analysis (function *pcoa.all*, Legendre 2007) on  
628 the  $1 - \mathcal{I}$  dissimilarity matrix between the 70 major groups, resulting in 69 PCoA axes. We  
629 performed multivariate linear regressions (function ‘lm’) of the projections of groups onto the  
630 PCoA axes against six explanatory variables: the amount of biogeographic structure, the scale  
631 of biogeographic organization, the within-basin autocorrelation, the latitudinal  
632 autocorrelation, the logarithm of group diversity and the logarithm of group body size. Each  
633 of these explanatory variables explained a significant part of the variance in the groups’  
634 projections onto all PCoA axes ( $p < 10^{-3}$ ). When considering each PCoA axis separately,  
635 groups’ projections onto the first two PCoA axes could be well predicted by the combination  
636 of these six explanatory variables ( $R_{adj.}^2 = 0.86$ ,  $p = 10^{-25}$  for the first axis,  $R_{adj.}^2 = 0.69$ ,  
637  $p = 10^{-15}$  for the second axis), while this was not the case for subsequent PCoA axes  
638 ( $R_{adj.}^2 < 0.17$ ,  $p \gtrsim 10^{-2}$ ). Therefore the first two PCoA axes carry most of the interpretable  
639 biogeographic variation across groups, and as a consequence we focused on the ordination of  
640 the groups along those two axes.

641  
642 *Disentangling the effect of body size, diversity and ecology*

643 We assessed correlations between continuous variables using Pearson’s correlation coefficient  
644 and associated t-test (function *cor.test*). We tested the effect of ecology (with four factor  
645 levels: phototrophs, phagotrophs, metazoans and parasites) on a continuous variable (i.e.,  
646 group position on the first two PCoA axes, or a ratio of explained variances) by an Analysis  
647 of Variance (ANOVA), and the respective effects of ecology and a continuous covariate  
648 (either log body size or log diversity) by an Analysis of Covariance (ANCOVA; functions *lm*  
649 and *anova*). We considered the t-tests between pairs of ecological categories only when the F-  
650 test was significant, and grouped ecological categories together when this improved the  
651 model. We used a 5% significance threshold.

652  
653 *Abiotic environmental variables*

654 For each sample, we used as local abiotic conditions the mean annual values measured at the  
655 approximate location and depth of the sample for temperature, nitrate, phosphate and silicate  
656 concentrations, dissolved oxygen concentration, oxygen saturation and apparent oxygen  
657 utilization (World Ocean Atlas 2013; Boyer et al., 2013). We also used iron concentration  
658 values derived from model simulations (Menemenlis et al., 2008). We conducted a Principal  
659 Component Analysis (PCA) on these abiotic environmental variables, separately for surface  
660 and DCM samples, after centering and standardization (function *dudi.pca*, R package ‘ade4’;  
661 Chessel, Dufour, & Thioulouse, 2004). We retained the first three axes for further analysis  
662 (axes with eigenvalue larger than 0.8).

663 For surface samples, the first axis amounts to 44% of the total variance (eigenvalue =  
664 3.5), and corresponds to variation in temperature as well as in nitrate, phosphate, silicate and  
665 dissolved oxygen concentrations. The second axis amounts to 26% of variance (eigenvalue =



666 2.1) and corresponds to variation in oxygen saturation and utilization. The third axis amounts  
667 to 16% of variance (eigenvalue = 1.3) and is mostly driven by iron concentration (Fig. S11).

668 For DCM samples, the first axis amounts to 51% of the total variance (eigenvalue =  
669 4.1), and corresponds mostly to variation in phosphate and nitrate concentration, as well as  
670 oxygen utilization and saturation. The second axis amounts to 27% of variance (eigenvalue =  
671 2.2), and corresponds mostly to variation in temperature and dissolved oxygen concentration.  
672 The third axis amounts to 10% of variance (eigenvalue = 0.84) and is driven by iron  
673 concentration.

674

#### 675 *Biotic environmental variables*

676 We used the relative abundances in the community of the 70 major groups of eukaryotic  
677 plankton under study as proxy for local biotic conditions. We estimated the local relative  
678 abundance  $a_{G,i}$  of a group in sample  $i$  as the mean of its relative read count in the four size  
679 fractions:

$$a_{G,i} = \frac{\sum_{f=1}^4 \sum_{t \in G} p_{t,f,i}}{\sum_{f=1}^4 \sum_t p_{t,f,i}}$$

680 where, as defined previously for the calculation of body size,  $p_{t,f,i}$  is the relative read count of  
681 OTU  $t$  in fraction  $f$  of sample  $i$ . The quantity  $a_{G,i}$  is not directly a measure of the relative  
682 number of individuals in group  $G$ , because it is obtained by summing over size fractions, and  
683 both the density of individuals per volume of water and the sampled volume of water differ  
684 widely among size fractions. It can nevertheless be used to characterize the variation in  
685 community composition across stations.

686 We conducted a Principal Component Analysis (PCA) on relative abundances  $a_G$   
687 across groups, separately for surface and DCM samples, after centring and standardization  
688 (function *dudi.pca*, R package ‘ade4’; Chessel et al., 2004), and we retained the axes with  
689 eigenvalue larger than 0.8 as biotic environmental variables for further analysis (the first 28  
690 axes for surface samples; the first 23 axes for DCM samples; Fig. S12). To avoid using the  
691 abundance of the group under study as an explanatory variable, we performed 70 separate  
692 PCAs, each time removing the focal group.

693

#### 694 *Transport times along currents*

695 To quantify the role of transport by currents in generating the observed biogeographies, we  
696 compared them with connectivity maps, known as Moran Eigenvector Maps (MEMs),  
697 obtained by decomposing the matrix of pairwise minimum transport times between stations  
698 using Principal Coordinate Analysis (PCoA), as described below (Legendre & Legendre,  
699 2012). In terrestrial ecology, similar maps are obtained by decomposing the matrix of  
700 pairwise geographic distances between sampled sites, and are classically used to assess the  
701 effect of dispersal limitation by distance on the distribution of species.

702 Here, we measure the connectivity of stations using minimum transport times between  
703 stations, in line with previous studies using Lagrangian transit times to explain the spatial  
704 distribution of marine plankton (Jönsson & Watson, 2016; Watson et al., 2011; Wilkins, van  
705 Sebille, Rintoul, Lauro, & Cavicchioli, 2013). This measure of connectivity is more robust  
706 than physical connectivity (i.e. the number of particles exchanged between stations), which  
707 strongly depends on the number of particles considered in the simulation as well as on the  
708 method used to reconstruct the trajectories of particles between stations. When seeking to  
709 explain patterns of taxon presence-absence for planktonic organisms, the minimum transport  
710 time between stations appears more relevant than the mean transport time, since only a few  
711 individuals are required to ‘seed’ a location with a given taxon (Jönsson & Watson, 2016;  
712 Wilkins et al., 2013). Moreover, mean transport times are not well-defined in the global ocean  
713 in the absence of a physically motivated upper time-scale (Jönsson & Watson, 2016). Finally,  
714 minimum transport time has been shown to be a good predictor of the average amount of

715 change in global plankton community composition that takes place along currents over a  
716 timescale of a year (i.e. a few thousands km), as a result of mixing, environmental variations,  
717 internal biotic interactions, behaviour and random compositional drift (Richter et al., 2019).

718 The minimum transport times were computed by Richter et al. (2019) using a  
719 numerical simulation of a global oceanic circulation model (MITgcm Darwin; Clayton et al.,  
720 2017), as summarized here. In this simulation, particles were released uniformly across the  
721 globe and advected for a cycle of 6 years using the horizontal velocity field along with a  
722 turbulent diffusivity. A set of 10,000-year trajectories was then constructed using this 6-year  
723 master cycle with particles seeded in each sampling station. Transport times between sampled  
724 locations were inferred by considering every event when a particle travelled from one  
725 sampled location to another, up to a radius of 200 km (see Richter et al., 2019 for more  
726 details). Only stations that had exchanged at least 10 particles were considered significantly  
727 connected. This computation was performed twice using simulations at 5-m depth and 75-m  
728 depth, so as to estimate the minimum transport times at the surface and at the DCM,  
729 respectively. We thus obtained two symmetric square matrices, one for surface samples and  
730 one for DCM samples, with minimum transport times as entries for connected pairs of stations  
731 and missing values for unconnected pairs.

732 From these two matrices of pairwise minimum transport times, we generated  
733 connectivity maps (MEMs) taking one value per station as follows (Legendre & Legendre,  
734 2012). We first computed for each matrix a minimum spanning tree among samples using  
735 function *spanntree* of R package ‘vegan’ (Oksanen et al., 2018). Following the  
736 recommendations of Legendre & Legendre (2012), we truncated the matrix of minimum  
737 transport times to retain only those connections necessary to connect all stations together (i.e.,  
738 to obtain a connex graph), if possible. For surface samples, we found that a single tree  
739 connected all stations as long as we retained all minimum transport times below 2.1 years  
740 (which corresponds to distances up to a few thousands km, cf. Fig. S9). By doing so, we  
741 effectively restricted ourselves to the range of minimum transport times over which minimum  
742 transport time increases approximately linearly with the geographic distance between stations.  
743 For DCM samples, no single spanning tree connected all stations, and so we chose to retain  
744 all minimum transport times below 3.15 years, which led to the Mediterranean, the Red Sea  
745 and the Southern Ocean being disconnected from the remaining samples. In both matrices, we  
746 set the diagonals and all the elements above the selected threshold to four times the threshold  
747 value, and we conducted a PCoA of the resulting truncated connectivity matrices (function  
748 *pcoa.all*, Legendre 2007). We obtained 61 eigenvectors associated with strictly positive  
749 eigenvalues for the surface connectivity matrix and 35 for the DCM connectivity matrix,  
750 which we used as connectivity maps at the surface and the DCM.

751 The resulting connectivity maps display patterns of connectivity at temporal and  
752 spatial scales ranging from a few days and a hundred km (the minimal distance between a pair  
753 of stations) up to the global scale, and can therefore be used to assess the influence of  
754 transport by currents both within and between ocean basins (Fig. S10), which is difficult to  
755 achieve when directly using pairwise transport times between stations. They identify  
756 oceanographic features that are known to support high connectivity, such as the North  
757 Atlantic gyre system, the eastward flow between Scandinavia and Siberia in the Arctic Ocean,  
758 the South Pacific gyre, the Mediterranean Sea cyclonic circulation and the western Indian  
759 Ocean gyre system (Fig. S10).

#### 760 *Variation partitioning*

762 To assess the influence of explanatory variables on biogeography, we compared their  
763 distribution across stations to that of assemblages through multivariate linear regression, after  
764 centering and standardization. We used the adjusted coefficient of multiple determination  $R_a^2$   
765 as a measure of the variance in the distribution of assemblages across stations (i.e., in the  
766 biogeography) that can be explained by a set of explanatory variables (function *rda*, R

767 package ‘vegan’; Oksanen et al., 2018). Given a partition of the explanatory variables into  
768 two subsets  $A$  and  $B$  (e.g., connectivity maps and local environmental conditions), we  
769 partitioned the explained variance  $R_{a,A \cap B}^2$  into the variance explained purely by subsets  $A$  and  
770  $B$  as well as jointly by both subsets:  $R_{a,A \cap B}^2 = \hat{R}_{a,A}^2 + \hat{R}_{a,B}^2 + \hat{R}_{a,A \cap B}^2$ . This partitioning can be  
771 obtained from the variance independently explained by subsets  $A$  and  $B$  ( $R_{a,A}^2$  and  $R_{a,B}^2$ ) as  
772 follows (function *varpart*, R package ‘vegan’):

$$\begin{aligned}\hat{R}_{a,A \cap B}^2 &= R_{a,A}^2 + R_{a,B}^2 - R_{a,A \cap B}^2 \\ \hat{R}_{a,A}^2 &= R_{a,A \cap B}^2 - R_{a,B}^2 \\ \hat{R}_{a,B}^2 &= R_{a,A \cap B}^2 - R_{a,A}^2\end{aligned}$$

773 For each taxonomic group, we tested whether each variable individually explained a  
774 significant amount of variance in the biogeography (functions *rda* and *anova*), separately for  
775 the surface and DCM sets of samples, and we retained only the significant variables in further  
776 analyses.

777 We partitioned the variance explained by the combination of all retained variables into  
778 the following three fractions: the variance purely explained by connectivity maps, that purely  
779 explained by environmental variables (lumping biotic and abiotic variables together) and  
780 finally the variance jointly explained by both sets of variables (function *varpart*). We  
781 interpreted the fraction purely explained by connectivity maps as the part of the biogeography  
782 that can be attributed to transport by currents, through the homogenization of plankton  
783 communities at the local scale and through neutral structuring at the global scale. We  
784 interpreted the fraction purely explained by environmental variables as the part of  
785 biogeography that can be attributed to the response of community composition to local biotic  
786 and abiotic conditions. The jointly explained fraction is the part of the biogeography that is  
787 compatible with either of the two mechanisms. Some overlap is indeed to be expected  
788 between patterns of connectivity and environmental conditions, since environmental  
789 conditions are themselves transported by currents. Finally, the unexplained part of the  
790 variance can be interpreted as reflecting the effect of environmental variations along currents  
791 between stations, which are not taken into account in our analyses, unmeasured local abiotic  
792 and biotic parameters, local fluctuations in community composition, and sampling and  
793 measurement noise. We compared across taxonomic groups the following quantities: the total  
794 explained variance, the fraction of it purely explained by connectivity maps, the fraction of it  
795 purely explained by the local environment, and the ratio of the variance explained by  
796 connectivity (both purely and jointly) over that explained by the local environment (both  
797 purely and jointly).

798 We similarly partitioned the variance explained by the local environment into the  
799 variance purely explained by abiotic variables, that purely explained by biotic variables, and  
800 the variance jointly explained by both sets of variables, and compared them across taxonomic  
801 groups.

802

## 803 **References:**

804

805 Blei, D. M., Ng, A. Y., & Jordan, M. I. (2003). Latent Dirichlet Allocation. *Journal of*  
806 *Machine Learning Research*, 3, 993–1022.

807 Boyer, T. P., Antonov, J. I., Baranova, O. K., Coleman, C., Garcia, H. E., Grodsky, A., ...  
808 O’Brien, T. D. (2013). *World Ocean Database 2013*.

809 Chessel, D., Dufour, A., & Thioulouse, J. (2004). The ade4 Package - I: One-Table Methods.  
810 *R News*, (4(1)), 5–10.

811 Clayton, S., Dutkiewicz, S., Jahn, O., Hill, C., Heimbach, P., & Follows, M. J. (2017).  
812 Biogeochemical versus ecological consequences of modeled ocean physics.

813 *Biogeosciences*, 14(11), 2877–2889. doi: 10.5194/bg-14-2877-2017

814 de Vargas, C., Audic, S., Henry, N., Decelle, J., Mahe, F., Logares, R., ... Tara Oceans, C.  
815 (2015). Eukaryotic plankton diversity in the sunlit ocean. *Science*, 348(6237). doi:

- 816 10.1126/science.1261605
- 817 Grün, B., & Hornik, K. (2011). *topicmodels: an R package for fitting topic models*.
- 818 Guillou, L., Bachar, D., Audic, S., Bass, D., Berney, C., Bittner, L., ... Christen, R. (2013).
- 819 The Protist Ribosomal Reference database (PR2): a catalog of unicellular eukaryote
- 820 Small Sub-Unit rRNA sequences with curated taxonomy. *Nucleic Acids Research*,
- 821 *41*(D1), D597–D604. doi: 10.1093/nar/gks1160
- 822 Ibarbalz, F. M., Henry, N., Brandão, M. C., Martini, S., Busseni, G., Byrne, H., ... Zinger, L.
- 823 (2019). Global Trends in Marine Plankton Diversity across Kingdoms of Life. *Cell*,
- 824 *179*(5), 1084-1097.e21. doi: 10.1016/j.cell.2019.10.008
- 825 Jönsson, B. F., & Watson, J. R. (2016). The timescales of global surface-ocean connectivity.
- 826 *Nature Communications*, *7*, 11239. doi: 10.1038/ncomms11239
- 827 Legendre, P., & Legendre, L. (2012). *Numerical Ecology*. Elsevier.
- 828 Mahé, F., Rognes, T., Quince, C., Vargas, C. de, & Dunthorn, M. (2014). Swarm: robust and
- 829 fast clustering method for amplicon-based studies. *PeerJ*, *2*, e593. doi:
- 830 10.7717/peerj.593
- 831 Meila, M. (2006). Comparing clusterings—an information based distance. *Journal of*
- 832 *Multivariate Analysis*, *98*(5), 873–895.
- 833 Menemenlis, D., Campin, J.-M., Heimbach, P., Hill, C., Lee, T., Schodlok, M., & Zhang, H.
- 834 (2008). *ECCO2: High Resolution Global Ocean and Sea Ice Data Synthesis*. 10.
- 835 Oksanen, J., Blanchet, F. G., Friendly, M., Kindt, R., Legendre, P., McGlinn, D., ... Wagner,
- 836 H. (2018). *vegan: Community Ecology Package, version 2.5-2*.
- 837 Paradis, E., & Schliep, K. (2018). ape 5.0: an environment for modern phylogenetics and
- 838 evolutionary analyses in R. *Bioinformatics*.
- 839 Phan, X.-H., Nguyen, L.-M., & Horiguchi, S. (2008). Learning to classify short and sparse
- 840 text & web with hidden topics from large-scale data collections. *Proceeding of the*
- 841 *17th International Conference on World Wide Web - WWW '08*, 91. doi:
- 842 10.1145/1367497.1367510
- 843 R Core Team. (2018). *R: A Language and Environment for Statistical Computing*. Vienna,
- 844 Austria: R Foundation for Statistical Computing.
- 845 Richter, D. J., Watteaux, R., Vannier, T., Leconte, J., Frémont, P., Reygondeau, G., ...
- 846 Coordinators, T. O. (2019). Genomic evidence for global ocean plankton
- 847 biogeography shaped by large-scale current systems. *BioRxiv*, 867739. doi:
- 848 10.1101/867739
- 849 Sommeria-Klein, G., Zinger, L., Coissac, E., Iribar, A., Schimann, H., Taberlet, P., & Chave,
- 850 J. (2019). Latent Dirichlet Allocation reveals spatial and taxonomic structure in a
- 851 DNA-based census of soil biodiversity from a tropical forest. *Molecular Ecology*
- 852 *Resources*. doi: 10.1111/1755-0998.13109
- 853 Watson, J. R., Hays, C. G., Raimondi, P. T., Mitarai, S., Dong, C., McWilliams, J. C., ...
- 854 Siegel, D. A. (2011). Currents connecting communities: nearshore community
- 855 similarity and ocean circulation. *Ecology*, *92*(6), 1193–1200. doi: 10.1890/10-1436.1
- 856 Wilkins, D., van Sebille, E., Rintoul, S. R., Lauro, F. M., & Cavicchioli, R. (2013). Advection
- 857 shapes Southern Ocean microbial assemblages independent of distance and
- 858 environment effects. *Nature Communications*, *4*(1). doi: 10.1038/ncomms3457
- 859
